# Supplementary material for: Mental Health and Quality of Life Among Veterans Employed as Peer and Vocational Rehabilitation Specialists
Source: Atypon-hosted journal article supplement (doi:10.1176/appi.ps.201400105), 2015-01-02
Supplement: appi.ps.201400105.ds001.pdf [file appi.ps.201400105.ds001.pdf]

Online Appendix Table 1. About Your Work

|                                                   | Peer Specialists |           | VR Specialists |           | Test statistic <sup>a</sup> | p≤   |
|---------------------------------------------------|------------------|-----------|----------------|-----------|-----------------------------|------|
|                                                   | N                | %         | N              | %         |                             |      |
| Time in job                                       |                  |           |                |           | 169.58                      | .001 |
| < 6 months                                        | 29               | 19%       | 31             | 14%       |                             |      |
| 6-12 months                                       | 7                | 5%        | 156            | 70%       |                             |      |
| > 12 months                                       | 113              | 76%       | 35             | 16%       |                             |      |
| Hours per week                                    |                  |           |                |           | 18.05                       | .001 |
| 1-30                                              | 17               | 11%       | 4              | 2%        |                             |      |
| 31-40                                             | 97               | 65%       | 176            | 80%       |                             |      |
| >40                                               | 35               | 24%       | 41             | 19%       |                             |      |
| Hours direct service to veterans                  |                  |           |                |           | 3.42                        | n.s. |
| Up to 20 hours per week                           | 30               | 20%       | 29             | 13%       |                             |      |
| 21-30 hours per week                              | 52               | 35%       | 87             | 39%       |                             |      |
| > 31 hours per week                               | 66               | 45%       | 105            | 48%       |                             |      |
| Supervision hours                                 |                  |           |                |           | 17.56                       | .001 |
| None                                              | 19               | 13%       | 12             | 5%        |                             |      |
| Up to 1 hour/week                                 | 44               | 30%       | 38             | 17%       |                             |      |
| 1-2 hours/week                                    | 48               | 32%       | 92             | 41%       |                             |      |
| >2 hours/week                                     | 37               | 25%       | 80             | 36%       |                             |      |
| Satisfaction with amt supervision                 | 146              | 4.27±1.19 | 221            | 4.48±0.92 | t=-1.8                      | .07  |
| Work missed in past 6 months for medical reasons* |                  |           |                |           | 4.41                        | n.s. |
| None                                              | 68               | 48%       | 84             | 39%       |                             |      |
| Up to 1 week                                      | 51               | 36%       | 102            | 47%       |                             |      |

|                                                           |     |      |     |     |       |      |
|-----------------------------------------------------------|-----|------|-----|-----|-------|------|
| 1-2 weeks                                                 | 16  | 11%  | 21  | 10% |       |      |
| >2 weeks                                                  | 8   | 6%   | 9   | 4%  |       |      |
| Work missed in past 6 months for mental health reasons*   |     |      |     |     | 4.86  | n.s. |
| None                                                      | 112 | 76%  | 179 | 82% |       |      |
| Up to 1 week                                              | 20  | 14%  | 30  | 14% |       |      |
| 1-2 weeks                                                 | 8   | 5%   | 4   | 2%  |       |      |
| >2 weeks                                                  | 7   | 5%   | 6   | 3%  |       |      |
| Work missed in past 6 months for alcohol or drug reasons* |     |      |     |     | <1    | n.s. |
| None                                                      | 147 | 99%  | 218 | 99% |       |      |
| Up to 1 week                                              | 0   | 0    | 0   | 0   |       |      |
| 1-2 weeks                                                 | 0   | 0    | 0   | 0   |       |      |
| >2 weeks                                                  | 1   | 1%   | 1   | 1%  |       |      |
| Work missed in past 6 months for other reasons*           |     |      |     |     | 3.97  | n.s. |
| None                                                      | 101 | 69%  | 147 | 66% |       |      |
| Up to 1 week                                              | 31  | 21%  | 62  | 28% |       |      |
| 1-2 weeks                                                 | 11  | 7%   | 10  | 5%  |       |      |
| >2 weeks                                                  | 4   | 3%   | 3   | 1%  |       |      |
| Total Work missed in past 6 months for all reasons*       |     |      |     |     | 19.26 | .001 |
| Up to 1 week                                              | 89  | 60%  | 133 | 60% |       |      |
| 1 – 2 wks                                                 | 33  | 22%  | 74  | 33% |       |      |
| 2 - 3 weeks                                               | 22  | 15%  | 7   | 3%  |       |      |
| > 3 weeks                                                 | 5   | 3.4% | 8   | 4%  |       |      |

\* Possible satisfaction ratings ranged from 1 (not at all satisfied)...5 (very satisfied)

<sup>a</sup> All test statistics are chi-squares except satisfaction with amount of supervision

df for chi-square tests = 1- number of categories; df for satisfaction with amount of supervision=367.

Online Appendix Table 2. Work Limitations and Job Burnout

|                                       | Peer Specialists |      | VR Specialists |      | t    | df  | p≤ |
|---------------------------------------|------------------|------|----------------|------|------|-----|----|
|                                       | Mean             | s.d. | Mean           | s.d. |      |     |    |
| Work Limitations <sup>a</sup>         |                  |      |                |      |      |     |    |
| Time Management                       | 1.71             | .87  | 1.67           | .88  | <1   | 349 | ns |
| Physical Demands                      | 1.98             | 1.20 | 1.97           | 1.17 | <1   | 352 | ns |
| Mental-Interpersonal Demands          | 1.69             | .89  | 1.66           | .79  | <1   | 360 | ns |
| Output Demands                        | 1.60             | .92  | 1.57           | .79  | <1   | 357 | ns |
| Burnout <sup>b</sup>                  |                  |      |                |      |      |     |    |
| Emotional Exhaustion <sup>c</sup>     | 2.43             | 1.22 | 2.43           | 1.20 | <1   | 369 | ns |
| Depersonalization <sup>c</sup>        | 1.50             | .804 | 1.52           | .724 | <1   | 369 | ns |
| Personal Accomplishments <sup>d</sup> | 6.40             | .635 | 6.31           | .692 | 1.18 | 369 | ns |

<sup>a</sup>Possible scores for work limitations scores range from 1 to 5. Higher scores indicate more limitations.

<sup>b</sup>Possible burnout scores range from 1-7.

<sup>c</sup>Higher scores indicate higher levels of emotional exhaustion and depersonalization.

<sup>d</sup>Higher scores indicate greater sense of personal accomplishment (lower burnout).
